# Supplementary material
Source: PubMed Central journal article supplement (PMC6004574)
Supplement: ml8b00011_si_001.pdf [file ml8b00011_si_001.pdf]

## Supporting Information

### Development of Highly Potent and Selective Steroidal Inhibitors and Degraders of CDK8.

John M. Hatcher<sup>a,b</sup>, Eric S. Wang<sup>a,b</sup>, Liv Johannessen<sup>a,b</sup>, Nicholas Kwiatkowski<sup>a,b</sup>, Taebo Sim<sup>c</sup>, and Nathanael S. Gray<sup>a,b,\*</sup>

a Department of Cancer Biology, Dana-Farber Cancer Institute, Boston, MA 02115, USA.

b Department of Biological Chemistry & Molecular Pharmacology, Harvard Medical School, 360 Longwood Ave, Longwood Center LC-2209, Boston, MA 02115, USA.

c Chemical Kinomics Research Center, Korea Institute of Science and Technology, Seoul, 136-791, Korea KU-KIST;

#### Content

Description of molecular overlay and docking studies.

Synthetic procedures for all compounds

**Figure S1.** Immunoblots for pS727-STAT1 and total STAT1 from lysates from HepG2 cells

**Figure S2.** Rescue experiments with Bortezomib, MLN4924, Lenalidomide and **31**

**Figure S3.** Q-PCR using two different primer sets for Cdk8 (relative to Actin) from Jurkat cells treated with **29** (1  $\mu$ M) or vehicle control for 24h.

**Figure S4.** Treatment of Jurkat cells with multiple concentrations of **29** for 24h

**Figure S5.** Degradation of CDK19 in Jurkat cells treated with **29** for 24h

Complete Kinomescan results

## Molecular overlay and Docking Studies

The molecular overlay shown in figure 1 of the manuscript was constructed based on the co-crystal structure of Cortistatin A with CDK8 (PDB: 4CRL). Compound 19 was energy minimized using ChemOffice 2016 Chem3D with MM2 energy minimization to minimum RMS gradient of 0.010. Once the energy minimized structure was obtained, it was imported into the co-crystal structure of Cortistatin A with CDK8 and pair fitted to Cortistatin A using 8 points.

## Experimental Procedures and Compounds Characterization

### General

All reactions were monitored by thin layer chromatography (TLC) with 0.25 mm E. Merck pre-coated silica gel plates (60 F<sub>254</sub>) and Waters LCMS system (Waters 2489 UV/Visible Detector, Waters 3100 Mass, Waters 515 HPLC pump, Waters 2545 Binary Gradient Module, Waters Reagent Manager, Waters 2767 Sample Manager) using SunFire™ C18 column (4.6 x 50 mm, 5 μm particle size): solvent gradient = 100% A at 0 min, 1% A at 5 min; solvent A = 0.035% TFA in Water; solvent B = 0.035% TFA in MeOH; flow rate : 2.5 mL/min. Purification of reaction products was carried out by flash chromatography using CombiFlash® Rf with Teledyne Isco RediSep® Rf High Performance Gold or Silicycle SiliaSep™ High Performance columns (4 g, 12 g, 24 g, 40 g or 80 g). The purity of all compounds was over 95% and was analyzed with Waters LCMS system. <sup>1</sup>H NMR and <sup>13</sup>C NMR spectra were obtained using a Bruker (500 MHz for <sup>1</sup>H, and 100 MHz for <sup>13</sup>C) spectrometer. Chemical shifts are reported relative to chloroform ( $\delta = 7.24$ ) for <sup>1</sup>H NMR or dimethyl sulfoxide ( $\delta = 2.50$ ) for <sup>1</sup>H NMR and dimethyl sulfoxide ( $\delta = 39.51$ ) for <sup>13</sup>C NMR. Data are reported as (*br* = broad, *s* = singlet, *d* = doublet, *t* = triplet, *q* = quartet, *m* = multiplet). Purified compounds were greater than 95% pure based on LCMS analysis. All enzyme IC<sub>50</sub>'s were obtained from Invitrogen using a Lanthascreen binding assay.

Representative Synthetic Scheme for the preparation of compounds **1-8**

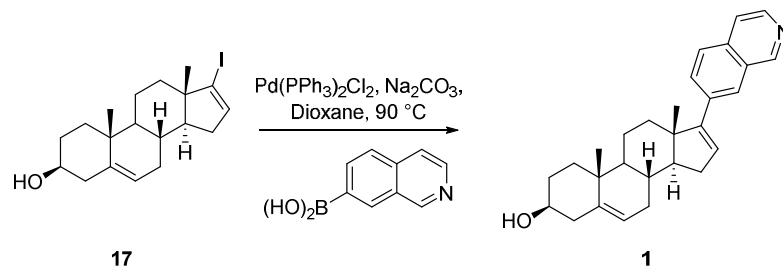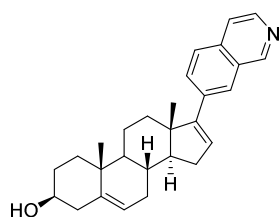

**(3S,8R,10R,13S,14S)-17-(isoquinolin-7-yl)-10,13-dimethyl-2,3,4,7,8,9,10,11,12,13,14,15-dodecahydro-1H-cyclopenta[a]phenanthren-3-ol (1)**

To a solution of (3S,8R,10R,13S,14S)-17-iodo-10,13-dimethyl-2,3,4,7,8,9,10,11,12,13,14,15-dodecahydro-1H-cyclopenta[a]phenanthren-3-ol (50 mg, 0.13 mmol) in 1,4-dioxane (5mL) and  $\text{Na}_2\text{CO}_3$  2M aq. (0.32 mL, 0.63 mmol) was added isoquinolin-7-ylboronic acid (25 mg, 0.14 mmol). The solution was thoroughly degassed and then  $\text{Pd(PPh}_3)_2\text{Cl}_2$  (5 mg, 0.006 mmol) was added and the mixture was heated to  $90^\circ\text{C}$  for 1 hour. The reaction was quenched with  $\text{H}_2\text{O}$  and extracted with EtOAc (3 X 50 mL), dried over  $\text{MgSO}_4$  and condensed to give a brown oil that was purified by reverse phase chromatography using a gradient of 1-90% ACN in  $\text{H}_2\text{O}$  to give the title compound as a beige solid (40 mg, 80% yield).  $^1\text{H NMR}$  (500 MHz,  $\text{DMSO-d}_6$ ):  $\delta$  9.66 (s, 1H), 8.55 (d,  $J = 5\text{Hz}$ , 1H), 8.35 (s, 1H), 8.20 (d,  $J = 6\text{Hz}$ , 1H), 8.13 (s, 2H), 6.39 (s, 1H), 5.33 (s, 1H), 3.28 (m, 1H), 3.17 (s, 1H), 2.38-1.99 (m, 6H), 1.81-1.52 (m, 8H), 1.45-1.33 (m, 3H), 1.15 (s, 3H), 1.03 (s, 3H). MS  $m/z$  400.39  $[\text{M}+\text{H}]^+$ .

The following compounds were prepared using the method above from either  $5\alpha$ -Androst-16-en-3 $\beta$ -ol, 17-iodo- (Compound **2**) or Androsta-5,16-dien-3-ol, 17-iodo-, (3 $\beta$ )- (Compounds **1**, and **3-8**) and the appropriate boronic ester/acid.

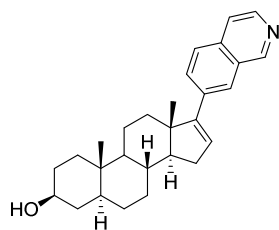

**(3S,5S,8R,10S,13S,14S)-17-(isoquinolin-7-yl)-10,13-dimethyl-2,3,4,5,6,7,8,9,10,11,12,13,14,15-tetradecahydro-1H-cyclopenta[a]phenanthren-3-ol (2)**

(76% yield).  $^1\text{H NMR}$  (500 MHz,  $\text{DMSO-d}_6$ ):  $\delta$  9.65 (s, 1H), 8.56 (d,  $J = 5\text{Hz}$ , 1H), 8.32 (s, 1H), 8.17 (d,  $J = 6\text{Hz}$ , 1H), 8.12 (s, 2H), 6.37 (s, 1H), 3.38 (m, 1H), 3.17 (s, 1H), 2.41-2.22 (m, 3H), 1.75-1.14 (m, 17H), 1.11 (s, 3H), 0.84 (s, 3H). MS  $m/z$  401.74  $[\text{M}+\text{H}]^+$ .

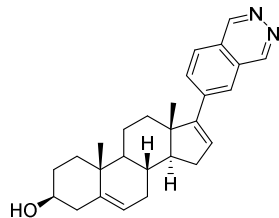

**(3S,8R,10R,13S,14S)-10,13-dimethyl-17-(phthalazin-6-yl)-2,3,4,7,8,9,10,11,12,13,14,15-dodecahydro-1H-cyclopenta[a]phenanthren-3-ol (3)**

(68% yield).  $^1\text{H}$  NMR (500 MHz, DMSO- $d_6$ ):  $\delta$  9.86 (s, 1H), 9.80 (s, 1H), 8.28 (s, 1H), 8.24 (d,  $J$  = 6Hz, 2H), 6.51 (s, 1H), 5.34 (s, 1H), 3.26 (m, 1H), 3.17 (s, 1H), 2.41-1.87 (m, 6H), 1.83-1.54 (m, 8H), 1.41-1.30 (m, 3H), 1.11 (s, 3H), 1.01 (s, 3H). MS  $m/z$  400.86  $[\text{M}+\text{H}]^+$ .

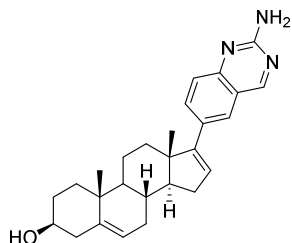

**(3S,8R,10R,13S,14S)-17-(2-aminoquinazolin-6-yl)-10,13-dimethyl-2,3,4,7,8,9,10,11,12,13,14,15-dodecahydro-1H-cyclopenta[a]phenanthren-3-ol (4)**

(60% yield).  $^1\text{H}$  NMR (500 MHz, DMSO- $d_6$ ):  $\delta$  9.38 (s, 1H), 8.06 (br, 2H), 7.89 (s, 1H), 7.80 (d,  $J$  = 6Hz, 1H), 7.54 (d,  $J$  = 6Hz, 1H), 6.34 (s, 1H), 5.32 (s, 1H), 3.29 (m, 1H), 3.17 (s, 1H), 1.83-1.21 (m, 17H), 0.93 (s, 3H), 0.44 (s, 3H). MS  $m/z$  416.37  $[\text{M}+\text{H}]^+$ .

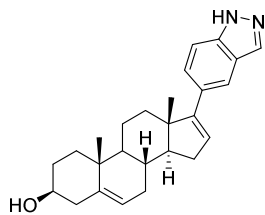

**(3S,8R,10R,13S,14S)-17-(1H-indazol-5-yl)-10,13-dimethyl-2,3,4,7,8,9,10,11,12,13,14,15-dodecahydro-1H-cyclopenta[a]phenanthren-3-ol (5)**

(58% yield).  $^1\text{H}$  NMR (500 MHz, DMSO- $d_6$ ):  $\delta$  12.91 (s, 1H), 7.98 (s, 1H), 7.58 (s, 1H), 7.43 (d,  $J$  = 6Hz, 1H), 7.21 (d,  $J$  = 6Hz, 1H), 6.38 (s, 1H), 5.30 (s, 1H), 4.63 (s, 1H), 3.27 (m, 1H), 2.22-1.20 (m, 18H), 0.93 (s, 3H), 0.43 (s, 3H). MS  $m/z$  389.48  $[\text{M}+\text{H}]^+$ .

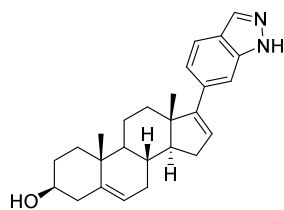

**(3S,8R,10R,13S,14S)-17-(1H-indazol-6-yl)-10,13-dimethyl-2,3,4,7,8,9,10,11,12,13,14,15-dodecahydro-1H-cyclopenta[a]phenanthren-3-ol (6)**

(53% yield).  $^1\text{H NMR}$  (500 MHz, DMSO- $d_6$ ):  $\delta$  12.91 (s, 1H), 7.97 (s, 1H), 7.46 (s, 1H), 7.31 (d,  $J = 6\text{Hz}$ , 1H), 7.18 (d,  $J = 6\text{Hz}$ , 1H), 6.39 (s, 1H), 5.30 (s, 1H), 4.63 (s, 1H), 3.27 (m, 1H), 2.22-1.20 (m, 19H), 0.93 (s, 3H), 0.43 (s, 3H). MS  $m/z$  389.48  $[\text{M}+\text{H}]^+$ .

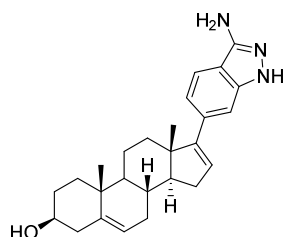

**(3S,8R,10R,13S,14S)-17-(3-amino-1H-indazol-6-yl)-10,13-dimethyl-2,3,4,7,8,9,10,11,12,13,14,15-dodecahydro-1H-cyclopenta[a]phenanthren-3-ol (7)**

(54% yield).  $^1\text{H NMR}$  (500 MHz, DMSO- $d_6$ ):  $\delta$  12.96 (s, 1H), 7.94 (s, 1H), 7.48 (s, 1H), 7.40 (d,  $J = 6\text{Hz}$ , 1H), 7.19 (d,  $J = 6\text{Hz}$ , 1H), 6.39 (s, 1H), 5.30 (s, 1H), 5.12 (s, 1H), 4.63 (s, 1H), 3.27 (m, 1H), 2.22-1.20 (m, 18H), 0.93 (s, 3H), 0.43 (s, 3H). MS  $m/z$  403.61  $[\text{M}+\text{H}]^+$ .

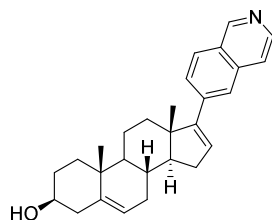

**(3S,8R,10R,13S,14S)-17-(isoquinolin-6-yl)-10,13-dimethyl-2,3,4,7,8,9,10,11,12,13,14,15-dodecahydro-1H-cyclopenta[a]phenanthren-3-ol (8)**

(64% yield).  $^1\text{H NMR}$  (500 MHz, DMSO- $d_6$ ):  $\delta$  9.47 (s, 1H), 8.44 (s, 1H), 8.20 (s, 2H), 8.11 (d,  $J = 6\text{Hz}$ , 1H), 7.95 (d,  $J = 6\text{Hz}$ , 1H), 6.40 (s, 1H), 5.30 (s, 1H), 3.29 (m, 1H), 2.97 (t,  $J = 10\text{Hz}$ , 1H), 2.30-1.96 (m, 5H), 1.85-1.26 (m, 12H), 0.91 (s, 3H), 0.43 (s, 3H). MS  $m/z$ : 400.56  $[\text{M}+\text{H}]^+$ .

Representative Synthetic Scheme for the preparation of compounds 9-16

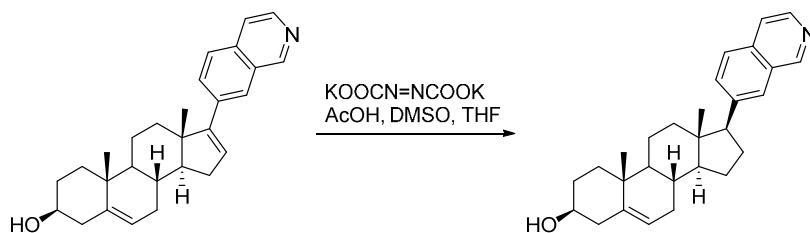

**(3S,8S,10R,13S,14S,17S)-17-(isoquinolin-7-yl)-10,13-dimethyl-2,3,4,7,8,9,10,11,12,13,14,15,16,17-tetradecahydro-1H-cyclopenta[a]phenanthren-3-ol (9)**

To a solution of (3S,8R,10R,13S,14S)-17-(isoquinolin-7-yl)-10,13-dimethyl-2,3,4,7,8,9,10,11,12,13,14,15-dodecahydro-1H-cyclopenta[a]phenanthren-3-ol (10 mg, 0.025 mmol) in DMSO/THF (1:1) (3 mL) was added potassium diazene-1,2-dicarboxylate (109 mg, 0.50 mmol) and AcOH (64  $\mu$ L, 1 mmol) in 3 portions over 2 hours. The mixture was stirred at rt overnight. An additional 109 mg of diazene-1,2-dicarboxylate and 64  $\mu$ L of AcOH was added and the mixture stirred 2 hours. Quenched with sat. aq. NaHCO<sub>3</sub> and extracted with EtOAc (3 X 50 mL). The combined organic extracts were washed with H<sub>2</sub>O, brine, dried over MgSO<sub>4</sub> and condensed to give a yellow oil that was purified by reverse phase HPLC using a gradient of 1-80% ACN in H<sub>2</sub>O to give the title compound as a brown oil (6 mg, 60 % yield). <sup>1</sup>H NMR (500 MHz, DMSO-d<sub>6</sub>):  $\delta$  9.66 (s, 1H), 8.57 (s, 1H), 8.29 (s, 2H), 8.16 (d, *J* = 6Hz, 1H), 7.99 (d, *J* = 6Hz, 1H), 5.32 (s, 1H), 3.28 (m, 1H), 2.98 (t, *J* = 10Hz, 1H), 2.35-1.98 (m, 5H), 1.87-1.29 (m, 12H), 0.93 (s, 3H), 0.46 (s, 3H). MS *m/z* 402.39 [M+H]<sup>+</sup>.

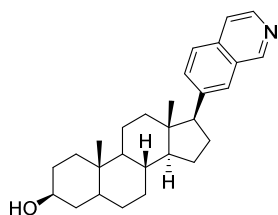

**(3S,8R,10S,13S,14S,17S)-17-(isoquinolin-7-yl)-10,13-dimethylhexadecahydro-1H-cyclopenta[a]phenanthren-3-ol (10)**

(71% yield). <sup>1</sup>H NMR (500 MHz, DMSO-d<sub>6</sub>)  $\delta$  9.68 (s, 1H), 8.54 (d, *J* = 5Hz, 1H), 8.37 (d, *J* = 6Hz, 1H), 8.31 (s, 1H), 8.19 (d, *J* = 6Hz, 1H), 8.04 (d, *J* = 6Hz, 1H), 3.36 (m, 1H), 3.17 (s, 1H), 2.97 (t, *J* = 10Hz, 1H), 2.41-2.22 (m, 3H), 1.78-1.12 (m, 17H), 0.72 (s, 3H), 0.41 (s, 3H). MS *m/z* 404.76 [M+H]<sup>+</sup>.

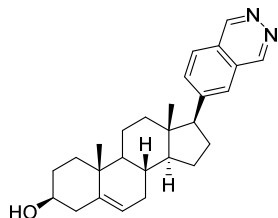

**(3S,8S,10R,13S,14S,17S)-10,13-dimethyl-17-(phthalazin-6-yl)-2,3,4,7,8,9,10,11,12,13,14,15,16,17-tetradecahydro-1H-cyclopenta[a]phenanthren-3-ol (11)**

(64% yield).  $^1\text{H NMR}$  (500 MHz, DMSO- $d_6$ )  $\delta$  9.86 (s, 1H), 9.80 (s, 1H), 8.28 (s, 1H), 8.24 (d,  $J = 6\text{ Hz}$ , 2H), 5.31 (s, 1H), 4.87 (s, 1H), 3.26 (m, 1H), 3.17 (s, 1H), 2.41-1.87 (m, 6H), 1.83-1.54 (m, 10H), 1.41-1.30 (m, 3H), 1.09 (s, 3H), 0.98 (s, 3H). MS  $m/z$  403.38  $[\text{M}+\text{H}]^+$ .

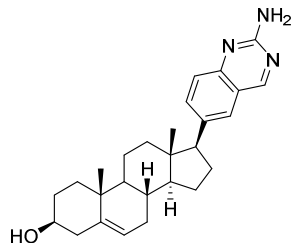

**(3S,8S,10R,13S,14S,17S)-17-(2-aminoquinazolin-6-yl)-10,13-dimethyl-2,3,4,7,8,9,10,11,12,13,14,15,16,17-tetradecahydro-1H-cyclopenta[a]phenanthren-3-ol (12)**

(52% yield).  $^1\text{H NMR}$  (500 MHz, DMSO- $d_6$ )  $\delta$  9.36 (s, 1H), 8.14 (br, 2H), 7.91 (s, 1H), 7.86 (d,  $J = 6\text{ Hz}$ , 1H), 7.57 (d,  $J = 6\text{ Hz}$ , 1H), 5.33 (s, 1H), 4.72 (s, 1H), 3.29 (m, 1H), 3.17 (s, 1H), , 2.97 (t,  $J = 10\text{ Hz}$ , 1H), 1.85-1.20 (m, 18H), 0.72 (s, 3H), 0.41 (s, 3H). MS  $m/z$  417.96  $[\text{M}+\text{H}]^+$ .

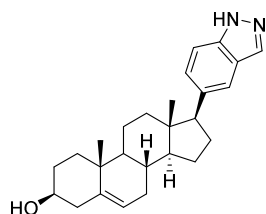

**(3S,8S,10R,13S,14S,17S)-17-(1H-indazol-5-yl)-10,13-dimethyl-2,3,4,7,8,9,10,11,12,13,14,15,16,17-tetradecahydro-1H-cyclopenta[a]phenanthren-3-ol (13)**

(50% yield).  $^1\text{H NMR}$  (500 MHz, DMSO- $d_6$ ):  $\delta$  12.91 (s, 1H), 7.98 (s, 1H), 7.58 (s, 1H), 7.43 (d,  $J = 6\text{ Hz}$ , 1H), 7.21 (d,  $J = 6\text{ Hz}$ , 1H), 5.31 (s, 1H), 4.67 (s, 1H), 3.27 (m, 1H), 2.22-1.20 (m, 20H), 0.92 (s, 3H), 0.44 (s, 3H). MS  $m/z$ : 391.28  $[\text{M}+\text{H}]^+$ .

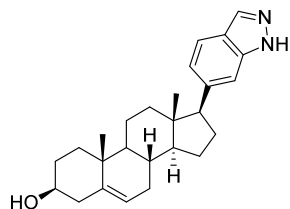

**(3S,8S,10R,13S,14S,17S)-17-(1H-indazol-6-yl)-10,13-dimethyl-2,3,4,7,8,9,10,11,12,13,14,15,16,17-tetradecahydro-1H-cyclopenta[a]phenanthren-3-ol (14)**

(53% yield).  $^1\text{H}$  NMR (500 MHz, DMSO- $d_6$ ):  $\delta$  12.91 (s, 1H), 7.97 (s, 1H), 7.46 (s, 1H), 7.31 (d,  $J$  = 6Hz, 1H), 7.18 (d,  $J$  = 6Hz, 1H), 5.32 (s, 1H), 4.63 (s, 1H), 3.27 (m, 1H), 2.22-1.20 (m, 20H), 0.91 (s, 3H), 0.46 (s, 3H). MS  $m/z$ : 391.34  $[\text{M}+\text{H}]^+$ .

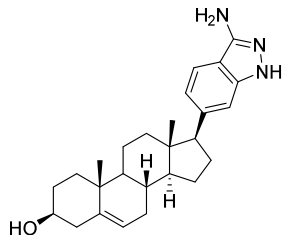

**(3S,8S,10R,13S,14S,17S)-17-(3-amino-1H-indazol-6-yl)-10,13-dimethyl-2,3,4,7,8,9,10,11,12,13,14,15,16,17-tetradecahydro-1H-cyclopenta[a]phenanthren-3-ol (15)**

(48% yield).  $^1\text{H}$  NMR (500 MHz, DMSO- $d_6$ ):  $\delta$  12.96 (s, 1H), 7.94 (s, 1H), 7.48 (s, 1H), 7.40 (d,  $J$  = 6Hz, 1H), 7.19 (d,  $J$  = 6Hz, 1H), 5.32 (s, 1H), 4.66 (s, 1H), 3.27 (m, 1H), 2.22-1.20 (m, 20H), 0.93 (s, 3H), 0.43 (s, 3H). MS  $m/z$ : 405.83  $[\text{M}+\text{H}]^+$ .

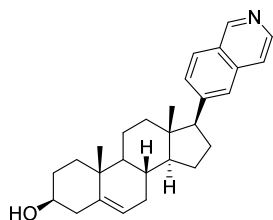

**(3S,8S,10R,13S,14S,17S)-17-(isoquinolin-6-yl)-10,13-dimethyl-2,3,4,7,8,9,10,11,12,13,14,15,16,17-tetradecahydro-1H-cyclopenta[a]phenanthren-3-ol (16)**

(68% yield).  $^1\text{H}$  NMR (500 MHz, DMSO- $d_6$ ):  $\delta$  9.36 (s, 1H), 8.14 (br, 2H), 7.91 (s, 1H), 7.86 (d,  $J$  = 6Hz, 1H), 7.57 (d,  $J$  = 6Hz, 1H), 5.33 (s, 1H), 3.29 (m, 1H), 3.17 (s, 1H), 2.98 (t,  $J$  = 10Hz, 1H), 1.85-1.20 (m, 19H), 0.72 (s, 3H), 0.41 (s, 3H). MS  $m/z$ : 402.83  $[\text{M}+\text{H}]^+$ .

Compounds **18** - **20** were prepared according to literature procedure using the route depicted below<sup>1</sup> starting from either 3 $\alpha$ -Androsterone (compound **18**), 3 $\beta$ -Androsterone (compound **20**) or 3 $\alpha$ -Hydroxy-5-androsten-17-one (compound **19**) With the exception of compound **13**, which was prepared using the procedure shown below. Compounds **11**, **26**, **14** & **27** were used without further purification. Characterization data was identical to that reported in the literature<sup>1</sup>.



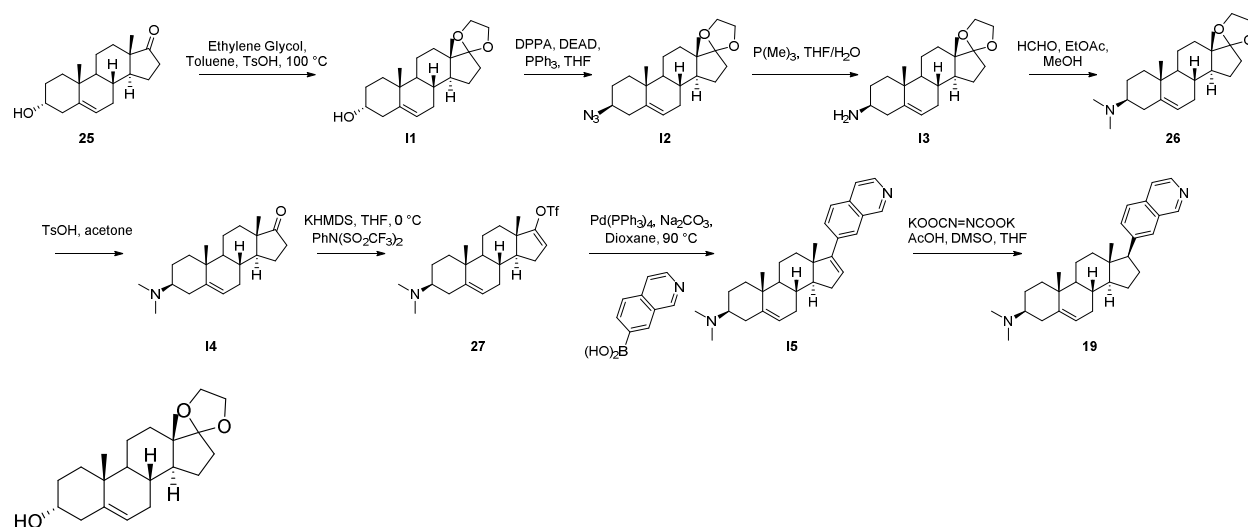

**(3R,8R,10R,13S,14S)-10,13-dimethyl-1,2,3,4,7,8,9,10,11,12,13,14,15,16-tetradecahydrospiro[cyclopenta[a]phenanthrene-17,2'-[1,3]dioxolan]-3-ol (11)**

Prepared according to literature procedure starting from cis-DHEA. Characterization was identical to that reported in the literature.<sup>2</sup>

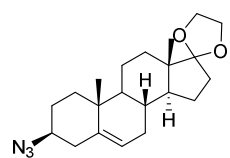

**(3S,8R,10R,13S,14S)-3-azido-10,13-dimethyl-1,2,3,4,7,8,9,10,11,12,13,14,15,16-tetradecahydrospiro[cyclopenta[a]phenanthrene-17,2'-[1,3]dioxolane] (12).**

Prepared according to literature procedure starting from 11. <sup>1</sup>H NMR (500 MHz, CDCl<sub>3</sub>): δ 5.36 (s, 1H), 3.94-3.83 (m, 4H), 2.25 (m, 2H), 2.06-1.97 (m, 2H), 1.95-1.81 (m, 4H), 1.72- 1.63 (m, 1H), 1.62-1.35 (m, 9H), 1.31-1.24 (m, 1H), 1.15-1.07 (m, 1H), 1.01 (s, 3H), 0.87 (s, 3H).

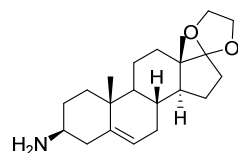

**(3S,8R,10R,13S,14S)-10,13-dimethyl-1,2,3,4,7,8,9,10,11,12,13,14,15,16-tetradecahydrospiro[cyclopenta[a]phenanthrene-17,2'-[1,3]dioxolan]-3-amine (13)**

(3S,8R,10R,13S,14S)-3-azido-10,13-dimethyl-1,2,3,4,7,8,9,10,11,12,13,14,15,16-tetradecahydrospiro[cyclopenta[a]phenanthrene-17,2'-[1,3]dioxolane] (2 g, 5.59 mmol) was dissolved in anhydrous THF (50 mL). H<sub>2</sub>O (503 μL, 28 mmol) was added followed by Me<sub>3</sub>P (1.15 mL, 11.2 mmol) was added and stirred for 6 hours. The reaction was quenched with H<sub>2</sub>O and extracted with EtOAc (3 X 50 mL). The combined organic extracts were washed with H<sub>2</sub>O, brine, dried over MgSO<sub>4</sub> and condensed to give a yellow oil that was purified by flash chromatography using a gradient of 1-10% MeOH in DCM to

give the title compound as a white solid (1.58 g, 85% yield).  $^1\text{H}$  NMR (500 MHz,  $\text{CDCl}_3$ ):  $\delta$  5.39 (s, 1H), 3.97-3.86 (m, 4H), 3.47 (br, 2H), 2.81 (m, 1H), 2.28 (m, 2H), 2.05-1.98 (m, 2H), 1.92-1.78 (m, 3H), 1.74-1.67 (m, 1H), 1.64-1.38 (m, 9H), 1.32-1.24 (m, 1H), 1.15-1.07 (m, 1H), 1.03 (s, 3H), 0.88 (s, 3H). MS  $m/z$  332.47  $[\text{M}+\text{H}]^+$ .

Compounds **14**, **26** and **27** were prepared according to literature procedure<sup>1</sup>. Characterization was identical to that reported in the literature<sup>1</sup>.

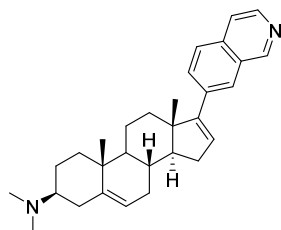

**(3S,8R,10R,13S,14S)-17-(isoquinolin-7-yl)-N,N,10,13-tetramethyl-2,3,4,7,8,9,10,11,12,13,14,15-dodecahydro-1H-cyclopenta[a]phenanthren-3-amine (15)**

Prepared according to literature procedure.<sup>1</sup>  $^1\text{H}$  NMR (500 MHz,  $\text{DMSO-d}_6$ ):  $\delta$  9.65 (s, 1H), 8.57 (d,  $J = 6\text{Hz}$ , 1H), 8.33 (s, 1H), 8.17 (d,  $J = 6\text{Hz}$ , 1H), 8.12 (s, 2H), 6.39 (s, 1H), 5.49 (s, 1H), 3.17 (s, 1H), 3.04 (m, 4H), 2.78 (s, 6H), 2.45-2.26 (m, 5H), 1.98-1.88 (m, 3H), 1.81-1.55 (m, 6H), 1.49-1.41 (m, 1H), 1.17 (s, 3H), 1.06 (s, 3H). MS  $m/z$ : 427.29  $[\text{M}+\text{H}]^+$ .

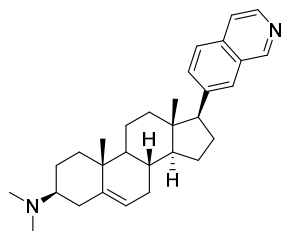

**(3S,8S,10R,13S,14S,17S)-17-(isoquinolin-7-yl)-N,N,10,13-tetramethyl-2,3,4,7,8,9,10,11,12,13,14,15,16,17-tetradecahydro-1H-cyclopenta[a]phenanthren-3-amine (19)**

Prepared according to literature procedure.<sup>1</sup>  $^1\text{H}$  NMR (500 MHz,  $\text{DMSO-d}_6$ ):  $\delta$  9.72 (s, 1H), 8.61 (d,  $J = 6\text{Hz}$ , 1H), 8.35 (d,  $J = 6\text{Hz}$ , 1H), 8.33 (s, 1H), 8.20 (d,  $J = 6\text{Hz}$ , 1H), 8.03 (d,  $J = 6\text{Hz}$ , 1H), 5.47 (s, 1H), 3.44 (m, 1H), 3.0 (t,  $J = 10\text{Hz}$ , 1H), 2.77 (s, 6H), 2.44-2.27 (m, 5H), 1.68-1.28 (m, 12H), 1.16-1.00 (m, 4H), 0.96 (s, 3H), 0.47 (s, 3H). MS  $m/z$ : 429.58  $[\text{M}+\text{H}]^+$ .

Compound **21** was prepared according to the following route:

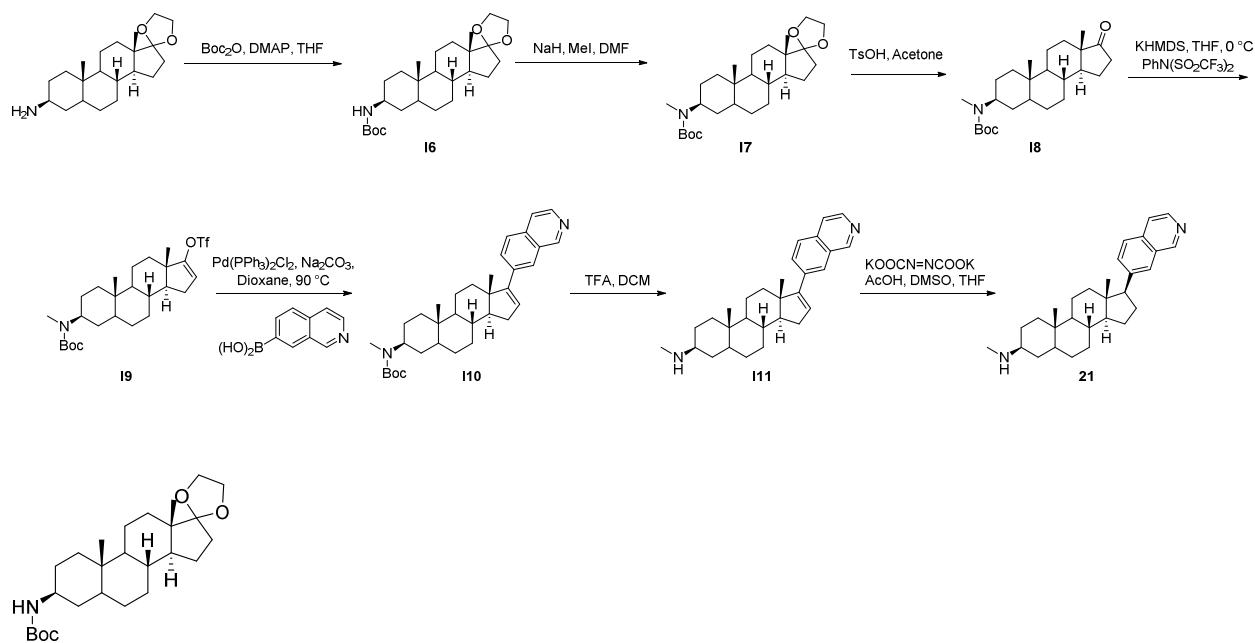

**tert-butyl ((3S,8R,10S,13S,14S)-10,13-dimethylhexadecahydrospiro[cyclopenta[a]phenanthrene-17,2'-[1,3]dioxolan]-3-yl)carbamate (16)**

To a solution of ((3S,8R,10S,13S,14S)-10,13-dimethylhexadecahydrospiro[cyclopenta[a]phenanthrene-17,2'-[1,3]dioxolan]-3-amine (500 mg, 1.50 mmol) in THF (25 mL) was added  $\text{Boc}_2\text{O}$  (393 mg, 1.80 mmol) followed by DMAP (37 mg, 0.3 mmol). The mixture was stirred for 3 hours. The reaction was quenched with  $\text{H}_2\text{O}$  and extracted with EtOAc (3 X 50 mL). The combined organic extracts were washed with  $\text{H}_2\text{O}$ , brine, dried over  $\text{MgSO}_4$  and condensed to give a yellow oil that was purified by flash chromatography using a gradient of 5-20% EtOAc in Hexanes to give the title compound as a white solid (602 mg, 93% yield).  $^1\text{H}$  NMR (500 MHz,  $\text{CDCl}_3$ ):  $\delta$  6.42 (br, 1H), 3.92-3.81 (m, 4H), 2.06-1.89 (m, 1H), 1.80-1.52 (m, 10H), 1.46 (s, 9H), 1.41-1.18 (m, 10H), 1.08-0.90 (m, 2H), 0.81 (s, 3H), 0.79 (s, 3H). MS  $m/z$  434.58  $[\text{M}+\text{H}]^+$

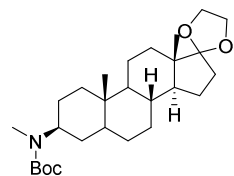

**tert-butyl ((3S,8R,10S,13S,14S)-10,13-dimethylhexadecahydrospiro[cyclopenta[a]phenanthrene-17,2'-[1,3]dioxolan]-3-yl)(methyl)carbamate (17)**

To a solution of tert-butyl ((3S,8R,10S,13S,14S)-10,13-dimethylhexadecahydrospiro[cyclopenta[a]phenanthrene-17,2'-[1,3]dioxolan]-3-yl)carbamate (602 mg, 1.39 mmol) in DMF (10 mL) was added NaH 60% in mineral oil (83 mg, 2.08 mmol). The mixture was stirred for 30 minutes, then MeI (208  $\mu\text{L}$ , 3.34 mmol) was added and stirred overnight. The reaction was quenched with  $\text{H}_2\text{O}$  and extracted with EtOAc (3 X 50 mL). The combined organic extracts were washed with  $\text{H}_2\text{O}$ , brine, dried over  $\text{MgSO}_4$  and condensed to give a yellow oil that was purified by flash chromatography using a gradient of 5-30% EtOAc in Hexanes to give the title compound as a white solid (602 mg, 93% yield).  $^1\text{H}$  NMR (500 MHz,  $\text{CDCl}_3$ ):  $\delta$  3.95-3.82 (m, 4H), 2.75 (s, 3H), 2.02-1.93 (m, 1H), 1.84-

1.50 (m, 10H), 1.48 (s, 9H), 1.45-1.18 (m, 10H), 1.10-0.90 (m, 2H), 0.86 (s, 3H), 0.82 (s, 3H). MS m/z 448.83 [M+H]<sup>+</sup>.

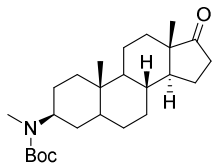

**tert-butyl ((3S,8R,10S,13S,14S)-10,13-dimethyl-17-oxohexadecahydro-1H-cyclopenta[a]phenanthren-3-yl)(methyl)carbamate (18)**

Prepared using the same procedure used for compound **14** and used without further purification. MS m/z 404.31 [M+H]<sup>+</sup>.

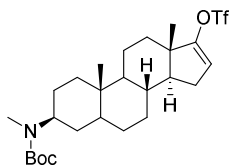

**(3S,8R,10S,13S,14S)-3-((tert-butoxycarbonyl)(methyl)amino)-10,13-dimethyl-2,3,4,5,6,7,8,9,10,11,12,13,14,15-tetradecahydro-1H-cyclopenta[a]phenanthren-17-yl trifluoromethanesulfonate (19)**

Prepared using the same procedure used for compound **27** and used without further purification. MS m/z 536.78 [M+H]<sup>+</sup>.

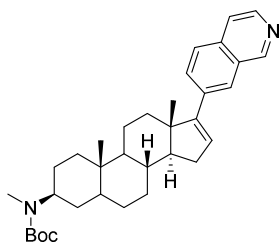

**tert-butyl ((3S,8R,10S,13S,14S)-17-(isoquinolin-7-yl)-10,13-dimethyl-2,3,4,5,6,7,8,9,10,11,12,13,14,15-tetradecahydro-1H-cyclopenta[a]phenanthren-3-yl)(methyl)carbamate (110)**

Prepared using the same procedure used for compound **1**. <sup>1</sup>H NMR (500 MHz, DMSO): δ 9.70 (s, 1H), 8.50 (d, *J* = 6Hz, 1H), 8.25 (s, 1H), 8.19 (d, *J* = 6Hz, 1H), 8.14 (d, *J* = 6Hz, 1H), 8.04 (d, *J* = 8Hz, 1H), 6.32 (s, 1H), 2.77 (s, 3H), 2.40-2.33 (m, 1H), 2.21-2.10 (m, 2H), 1.82-1.59 (m, 8H), 1.49 (s, 9H), 1.44-1.24 (m, 8H), 1.15 (s, 3H), 1.12-1.05 (m, 2H), 0.90 (s, 3H). MS m/z 515.63 [M+H]<sup>+</sup>

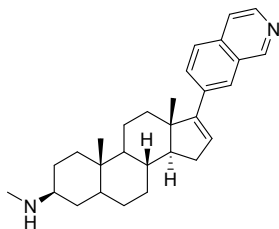

**(3S,8R,10S,13S,14S)-17-(isoquinolin-7-yl)-N,10,13-trimethyl-2,3,4,5,6,7,8,9,10,11,12,13,14,15-tetradecahydro-1H-cyclopenta[a]phenanthren-3-amine (I11)**

To a solution of tert-butyl ((3S,8R,10S,13S,14S)-17-(isoquinolin-7-yl)-10,13-dimethyl-2,3,4,5,6,7,8,9,10,11,12,13,14,15-tetradecahydro-1H-cyclopenta[a]phenanthren-3-yl)(methyl)carbamate (50 mg, 0.1 mmol) in DCM (10 mL) was added TFA (1 mL). The mixture was stirred for 30 minutes and the solvent removed in vacuo to give the title compound as a beige solid that was used without further purification. (40 mg, 98% yield). MS m/z 415.57 [M+H]<sup>+</sup>

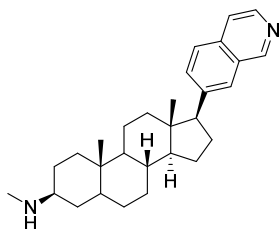

**(3S,8R,10S,13S,14S,17S)-17-(isoquinolin-7-yl)-N,10,13-trimethylhexadecahydro-1H-cyclopenta[a]phenanthren-3-amine (21)**

Prepared using the same procedure used for compound 9. MS m/z: 417.37 [M+H]<sup>+</sup>. 91% yield

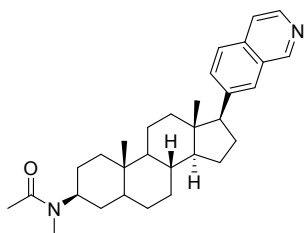

**N-((3S,8R,10S,13S,14S,17S)-17-(isoquinolin-7-yl)-10,13-dimethylhexadecahydro-1H-cyclopenta[a]phenanthren-3-yl)-N-methylacetamide (24)**

To a solution of (3S,8R,10S,13S,14S,17S)-17-(isoquinolin-7-yl)-N,10,13-trimethylhexadecahydro-1H-cyclopenta[a]phenanthren-3-amine (20 mg, 0.048 mmol) in THF (3 mL) and sat. aq. NaHCO<sub>3</sub> soln (2 mL) was added acetyl chloride (4 μL, 0.058 mmol). The mixture was stirred for 30 minutes and then the reaction was quenched with H<sub>2</sub>O and extracted with EtOAc (3 X 50 mL). The combined organic extracts were washed with H<sub>2</sub>O, brine, dried over MgSO<sub>4</sub> and condensed to give a yellow oil that was purified by reverse phase HPLC using a gradient of 1-80% ACN in H<sub>2</sub>O to give the title compound as a brown solid (12 mg, 57% yield). δ 9.70 (s, 1H), 8.62 (d, J = 6Hz, 1H), 8.33 (d, J = 6Hz, 1H), 8.31 (s, 1H), 8.22 (d, J = 6Hz,

1H), 8.01 (d,  $J = 6\text{Hz}$ , 1H), 3.54 (m, 1H), 3.21 (s, 3H), 3.1 (t,  $J = 10\text{Hz}$ , 1H), 2.70 (s, 3H), 2.44-2.27 (m, 6H), 1.68-1.28 (m, 12H), 1.16-1.00 (m, 4H), 0.94 (s, 3H), 0.44 (s, 3H). MS  $m/z$ : 459.72  $[\text{M}+\text{H}]^+$ .

Compound **22** was prepared according to the following route:

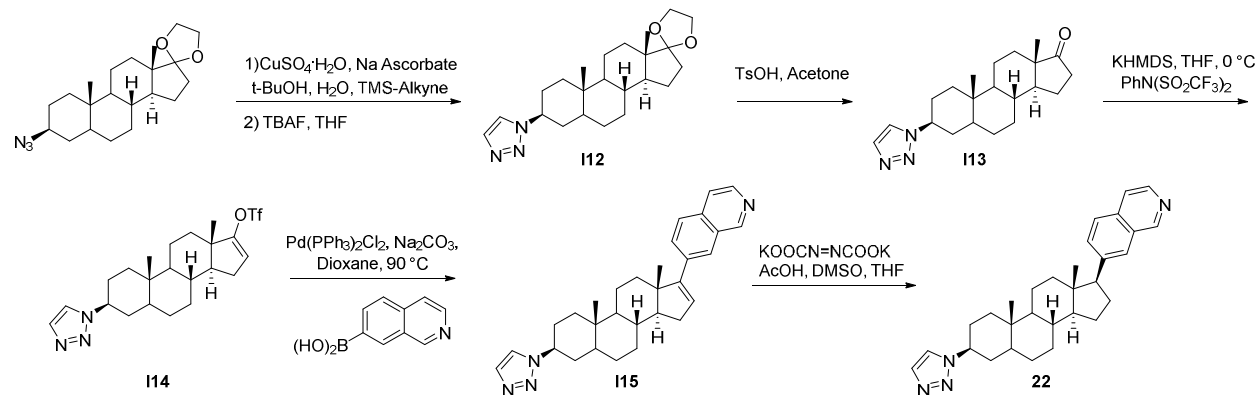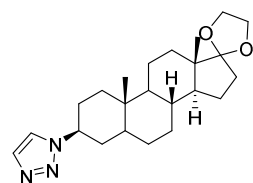

**1-((3S,8R,10S,13S,14S)-10,13-dimethylhexadecahydrospiro[cyclopenta[a]phenanthrene-17,2'-[1,3]dioxolan]-3-yl)-1H-1,2,3-triazole (**I12**)**

To a solution of (3S,8R,10S,13S,14S)-3-azido-10,13-dimethylhexadecahydrospiro[cyclopenta[a]phenanthrene-17,2'-[1,3]dioxolane] (500 mg, 1.39 mmol) in  $t\text{-BuOH}$  (10 mL) and  $\text{H}_2\text{O}$  (3 mL) was added  $\text{CuSO}_4 \cdot 5\text{H}_2\text{O}$  (18 mg, 0.07 mmol) and sodium ascorbate (6 mg, 0.03 mmol) followed by TMS-alkyne (231  $\mu\text{L}$ , 1.67 mmol). The reaction mixture was heated to  $70\text{ }^\circ\text{C}$  for 1 hour. The reaction was quenched with  $\text{H}_2\text{O}$  and extracted with EtOAc (3 X 50 mL). The combined organic extracts were washed with  $\text{H}_2\text{O}$ , brine, dried over  $\text{MgSO}_4$  and condensed to give a yellow oil that was dissolved in THF (20 mL). TBAF 1M in THF (6.95 mL, 6.95 mmol) was added and stirred for 30 minutes. The reaction was quenched with  $\text{H}_2\text{O}$  and extracted with EtOAc (3 X 50 mL). The combined organic extracts were washed with  $\text{H}_2\text{O}$ , brine, dried over  $\text{MgSO}_4$  and condensed to give a brown oil that was purified by flash chromatography using a gradient of 10-60% EtOAc in hexanes to give the title compound as a white solid (348 mg, 65 % yield).  $^1\text{H}$  NMR (500 MHz,  $\text{CDCl}_3$ ):  $\delta$  8.01 (q,  $J = 10\text{Hz}$ , 2H), 4.31 (m, 1H), 3.95-3.82 (m, 4H), 2.83 (m, 3H), 2.27 (m, 1H), 2.03-1.95 (m, 2H), 1.90-1.75 (m, 3H), 1.71-1.63 (m, 1H), 1.67-1.39 (m, 10H), 1.35-1.26 (m, 1H), 1.13-1.07 (m, 1H), 0.97 (s, 3H), 0.78 (s, 3H). MS  $m/z$ : 386.76  $[\text{M}+\text{H}]^+$ .

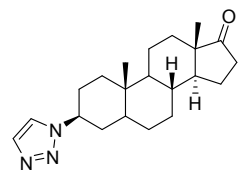

**(3S,8R,10S,13S,14S)-10,13-dimethyl-3-(1H-1,2,3-triazol-1-yl)hexadecahydro-17H-cyclopenta[a]phenanthren-17-one (I13)**

Prepared using the same procedure used for compounds **14** and used without further purification. MS  $m/z$  341.86  $[M+H]^+$ .

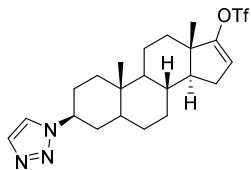

**(3S,8R,10S,13S,14S)-10,13-dimethyl-3-(1H-1,2,3-triazol-1-yl)-2,3,4,5,6,7,8,9,10,11,12,13,14,15-tetradecahydro-1H-cyclopenta[a]phenanthren-17-yl trifluoromethanesulfonate (I14)**

Prepared using the same procedure used for compounds **27** and used without further purification. MS  $m/z$  474.45  $[M+H]^+$ .

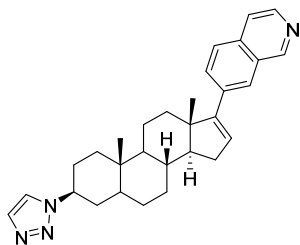

**7-((3S,8R,10S,13S,14S)-10,13-dimethyl-3-(1H-1,2,3-triazol-1-yl)-2,3,4,5,6,7,8,9,10,11,12,13,14,15-tetradecahydro-1H-cyclopenta[a]phenanthren-17-yl)isoquinoline (I15)**

Prepared using the same procedure used for compound **1**.  $^1\text{H}$  NMR (500 MHz, DMSO):  $\delta$  9.74 (s, 1H), 8.53 (d,  $J = 6\text{Hz}$ , 1H), 8.17 (s, 2H), 8.03 (q,  $J = 10\text{Hz}$ , 2H), 7.90 (s, 1H), 7.69 (s, 1H), 6.38 (s, 1H), 4.52 (m, 1H), 2.33-2.11 (m, 3H), 2.12-1.85 (m, 5H), 1.72-1.40 (m, 8H), 1.30-1.20 (m, 2H), 1.15-1.08 (m, 1H), 0.97 (s, 3H), 0.92-0.87 (m, 1H), 0.51 (s, 3H). MS  $m/z$  453.51  $[M+H]^+$

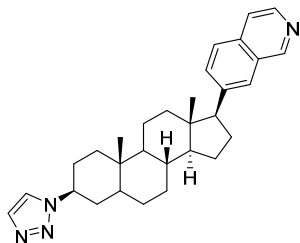

**7-((3S,8R,10S,13S,14S,17S)-10,13-dimethyl-3-(1H-1,2,3-triazol-1-yl)hexadecahydro-1H-cyclopenta[a]phenanthren-17-yl)isoquinoline (22)**

Prepared using the same procedure used for compound **9**.  $^1\text{H}$  NMR (500 MHz, DMSO):  $\delta$  9.76 (s, 1H), 8.57 (d,  $J = 6\text{Hz}$ , 1H), 8.21 (s, 2H), 8.06 (q,  $J = 10\text{Hz}$ , 2H), 7.92 (s, 1H), 7.72 (s, 1H), 4.58 (m, 1H), 3.02 (t,  $J =$

10Hz, 1H), 2.33-2.11 (m, 3H), 2.06-1.82 (m, 5H), 1.69-1.37 (m, 10H), 1.33-1.22 (m, 2H), 1.13-1.04 (m, 1H), 0.95 (s, 3H), 0.92-0.87 (m, 1H), 0.53 (s, 3H). MS m/z 455.68 [M+H]<sup>+</sup>.

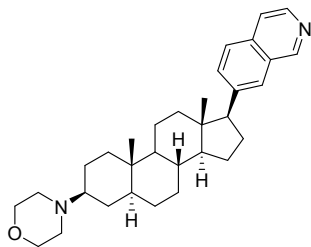

**4-((3S,5S,8R,10S,13S,14S,17S)-17-(isoquinolin-7-yl)-10,13-dimethylhexadecahydro-1H-cyclopenta[a]phenanthren-3-yl)morpholine (23)**

Prepared according to literature procedure<sup>1</sup>.

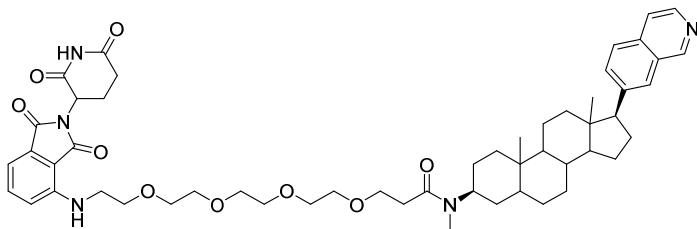

**1-((2-(2,6-dioxopiperidin-3-yl)-1,3-dioxoisindolin-4-yl)amino)-N-((3S,17S)-17-(isoquinolin-7-yl)-10,13-dimethylhexadecahydro-1H-cyclopenta[a]phenanthren-3-yl)-N-methyl-3,6,9,12-tetraoxapentadecan-15-amide (29)**

To a solution of (3S,8R,10S,13S,14S,17S)-17-(isoquinolin-7-yl)-N,10,13-trimethylhexadecahydro-1H-cyclopenta[a]phenanthren-3-amine (20 mg, 0.048 mmol) in DMF was added HATU (37 mg, 0.096 mmol) and 1-((2-(2,6-dioxopiperidin-3-yl)-1,3-dioxoisindolin-4-yl)amino)-3,6,9,12-tetraoxapentadecan-15-oic acid (28 mg, 0.053 mmol) followed by DIEA (42  $\mu$ L, 0.24 mmol). The reaction was stirred for 30 minutes and then injected directly onto the HPLC and purified using a gradient of 1-90% ACN in H<sub>2</sub>O to give the title compound as a yellow solid (8 mg, 18% yield). <sup>1</sup>H NMR (500 MHz, DMSO):  $\delta$  11.09 (s, 1H), 9.71 (s, 1H), 8.60 (s, 1H), 8.36-8.29 (m, 3H), 8.19-8.16 (m, 1H), 7.99 (t, *J* = 5Hz, 1H), 7.60-7.54 (m, 1H), 7.15 (dd, *J* = 5Hz, 8Hz, 1H), 7.04 (d, *J* = 6Hz, 1H), 5.12- 5.03 (m, 1H), 4.27 (m, 1H), 3.64-3.59 (m, 4H), 3.54-3.45 (m, 14H), 2.99-2.84 (m, 2H), 2.79 (s, 3H), 2.06-1.95 (m, 3H), 1.83-0.91 (m, 24H), 0.77 (s, 3H), 0.43 (s, 3H). MS m/z: 921.49 [M+H]<sup>+</sup>.



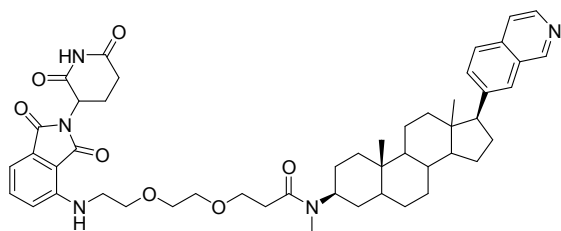

**3-(2-(2-((2-(2,6-dioxopiperidin-3-yl)-1,3-dioxoisindolin-4-yl)amino)ethoxy)ethoxy)-N-((3S,10S,17S)-17-(isoquinolin-7-yl)-10,13-dimethylhexadecahydro-1H-cyclopenta[a]phenanthren-3-yl)-N-methylpropanamide (30)**

$^1\text{H}$  NMR (500 MHz, DMSO):  $\delta$  11.10 (s, 1H), 9.67 (s, 1H), 8.59 (s, 1H), 8.31-8.24 (m, 3H), 8.15 (d,  $J = 7$  Hz, 1H), 7.96 (t,  $J = 5$  Hz, 1H), 7.76 (dd,  $J = 5$  Hz, 8 Hz, 1H), 7.66-7.52 (m, 1H), 7.24-7.12 (m, 1H), 5.12 (m, 1H), 4.25 (m, 1H), 3.68 (m, 8H), 3.00-2.84 (m, 4H), 2.77 (s, 3H), 2.26 (m, 2H), 1.71-0.91 (m, 25H), 0.79 (s, 3H), 0.46 (s, 3H). MS  $m/z$ : 832.79  $[\text{M}+\text{H}]^+$ .

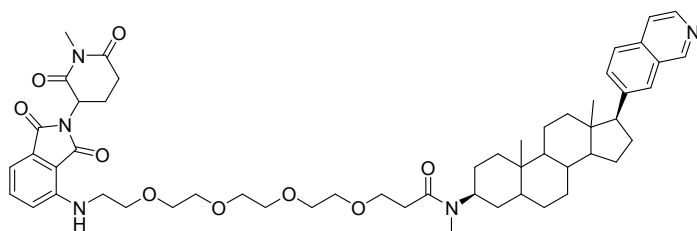

**N-((3S,17S)-17-(isoquinolin-7-yl)-10,13-dimethylhexadecahydro-1H-cyclopenta[a]phenanthren-3-yl)-N-methyl-1-((2-(1-methyl-2,6-dioxopiperidin-3-yl)-1,3-dioxoisindolin-4-yl)amino)-3,6,9,12-tetraoxapentadecan-15-amide (31)**

$^1\text{H}$  NMR (500 MHz, DMSO):  $\delta$  9.71 (s, 1H), 8.60 (s, 1H), 8.35-8.29 (m, 3H), 8.19-8.16 (m, 1H), 7.99 (t,  $J = 5$  Hz, 1H), 7.61-7.57 (m, 1H), 7.16 (dd,  $J = 5$  Hz, 8 Hz, 1H), 7.04 (d,  $J = 6$  Hz, 1H), 5.12-5.03 (m, 1H), 4.27 (m, 1H), 3.64-3.45 (m, 18H), 3.01 (s, 3H), 2.99-2.91 (m, 2H), 2.80 (s, 3H), 2.06-1.95 (m, 3H), 1.83-0.91 (m, 24H), 1.16 (s, 3H), 1.06 (s, 3H), 0.76 (s, 3H). MS  $m/z$ : 935.71  $[\text{M}+\text{H}]^+$ .

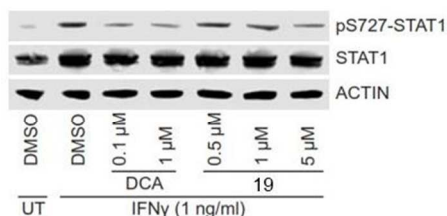

**Figure S1.** Immunoblots for pS727-STAT1 and total STAT1 from lysates from HepG2 cells treated with interferon gamma (IFN $\gamma$ ) and Compound 19 and DCA as indicated for 18h.

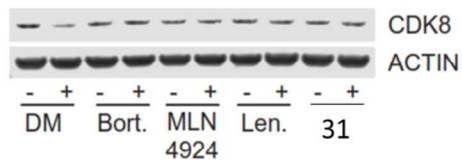

cells pre-treated with rescue compounds 1h;  
then treated with 1  $\mu$ M JH-XI-10-02 6h

Bortezomib = 500 nM  
MLN4924 = 1  $\mu$ M  
Lenalidomide = 10  $\mu$ M  
31 = 10  $\mu$ M

**Figure S2.** Rescue experiments with Bortezomib, MLN4924, Lenalidomide and **31**

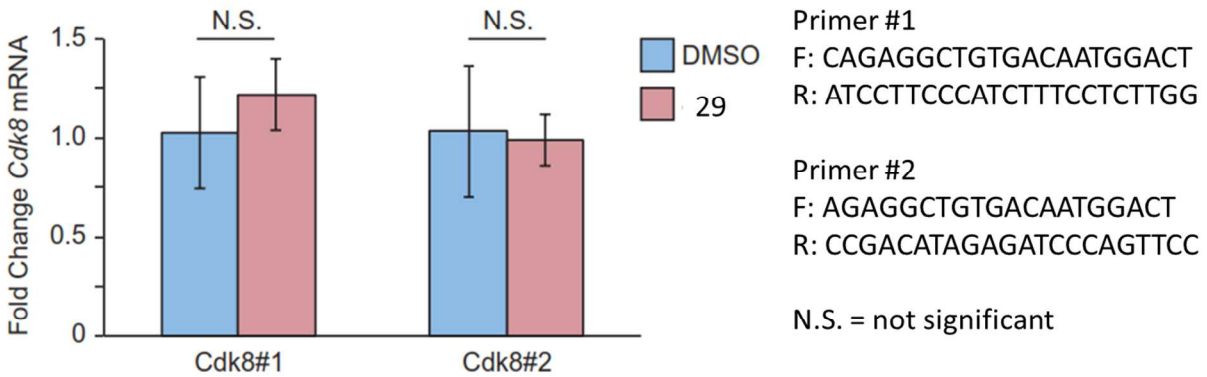

**Figure S3.** Q-PCR using two different primer sets for Cdk8 (relative to Actin) from Jurkat cells treated with **29** (1  $\mu$ M) or vehicle control for 24h.

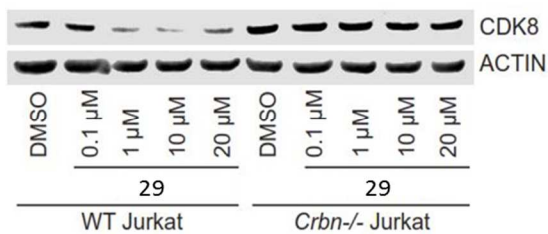

WT or *Crbn*<sup>-/-</sup> Jurkat cells treated for 24h and immunoblotted for CDK8

**Figure S4.** Treatment of Jurkat cells with multiple concentrations of **29** for 24h

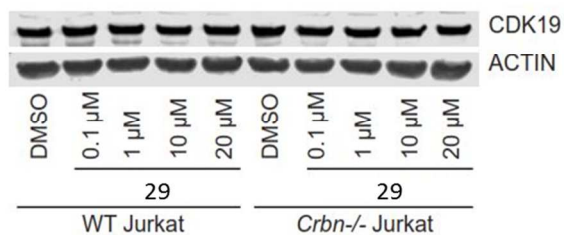

WT or *Crbn*<sup>-/-</sup> Jurkat cells treated for 24h and immunoblotted for CDK19

**Figure S5.** Degradation of CDK19 in Jurkat cells treated with **29** for 24h

### KinomeScan analysis<sup>3</sup> (% Control at 10μM)

|                             |     |
|-----------------------------|-----|
| Compound Concentration (uM) | 10  |
| CDK11 (CDK19)               | 0.4 |
| CDK8                        | 2.9 |
| PIKFYVE                     | 8.5 |
| NEK1                        | 8.7 |
| RIOK2                       | 11  |
| PRKG1                       | 14  |
| PKAC-beta                   | 19  |
| HASPIN                      | 24  |
| NEK5                        | 24  |
| MRCKA                       | 25  |
| PAK3                        | 26  |
| TTK                         | 27  |
| CDKL2                       | 30  |
| SRPK1                       | 33  |
| MEK6                        | 36  |
| ASK1                        | 37  |
| PKN2                        | 37  |
| ALK                         | 38  |
| LRRK2                       | 38  |
| ACVR2B                      | 39  |
| PKAC-alpha                  | 40  |
| PIP5K1A                     | 43  |
| LKB1                        | 44  |
| DYRK1B                      | 45  |
| LTK                         | 45  |

|                            |    |
|----------------------------|----|
| DMPK2                      | 46 |
| RIPK1                      | 47 |
| TESK1                      | 47 |
| ICK                        | 49 |
| ROS1                       | 49 |
| MAK                        | 50 |
| NEK3                       | 50 |
| TRKA                       | 50 |
| CHEK2                      | 51 |
| EGFR(L747-S752del, P753S)  | 51 |
| ERK3                       | 52 |
| LIMK2                      | 52 |
| PRKCE                      | 52 |
| ZAK                        | 52 |
| NEK2                       | 53 |
| PRKCCQ                     | 53 |
| PIM2                       | 54 |
| RIOK1                      | 54 |
| TXK                        | 54 |
| HUNK                       | 55 |
| RSK4(Kin.Dom.1-N-terminal) | 55 |
| SIK                        | 55 |
| ADCK4                      | 56 |
| NLK                        | 56 |
| SIK2                       | 56 |
| SRPK3                      | 56 |
| AKT3                       | 58 |
| FLT3                       | 58 |
| GSK3A                      | 58 |
| TNK1                       | 58 |
| MET(Y1235D)                | 59 |
| ABL1-nonphosphorylated     | 60 |
| PIK3CA(I800L)              | 60 |
| RSK2(Kin.Dom.1-N-terminal) | 60 |
| ALK(C1156Y)                | 61 |
| DRAK2                      | 61 |
| MYLK                       | 61 |
| TIE1                       | 61 |
| CLK1                       | 62 |
| EGFR                       | 62 |
| EGFR(E746-A750del)         | 62 |
| FLT3(D835V)                | 62 |
| MAPKAPK2                   | 62 |

|                               |    |
|-------------------------------|----|
| MERTK                         | 62 |
| FLT3(N841I)                   | 63 |
| KIT(L576P)                    | 63 |
| WEE1                          | 63 |
| MAP3K4                        | 64 |
| STK33                         | 64 |
| DMPK                          | 65 |
| HIPK4                         | 65 |
| MAP4K3                        | 65 |
| MELK                          | 65 |
| PLK3                          | 65 |
| QSK                           | 65 |
| TRKC                          | 65 |
| DCAMKL1                       | 66 |
| NEK7                          | 66 |
| PKNB(M.tuberculosis)          | 66 |
| TBK1                          | 66 |
| WNK2                          | 66 |
| ABL1(H396P)-nonphosphorylated | 67 |
| CSNK1G3                       | 67 |
| EGFR(L858R)                   | 67 |
| ARK5                          | 68 |
| EPHB4                         | 68 |
| FLT3(D835H)                   | 68 |
| INSRR                         | 68 |
| JNK1                          | 68 |
| MET(M1250T)                   | 68 |
| MLK1                          | 68 |
| MUSK                          | 68 |
| AXL                           | 69 |
| MARK3                         | 69 |
| MEK5                          | 69 |
| YANK2                         | 69 |
| CDK3                          | 70 |
| CDKL1                         | 70 |
| CLK3                          | 70 |
| CSNK1G2                       | 70 |
| KIT(V559D,V654A)              | 70 |
| TRKB                          | 70 |
| TSSK3                         | 70 |
| CLK4                          | 71 |
| EGFR(L747-E749del, A750P)     | 71 |
| EGFR(T790M)                   | 71 |

|                               |    |
|-------------------------------|----|
| KIT                           | 71 |
| MAP3K2                        | 71 |
| PAK2                          | 71 |
| PLK4                          | 71 |
| SRPK2                         | 71 |
| TNIK                          | 71 |
| ULK1                          | 71 |
| BLK                           | 72 |
| FER                           | 72 |
| FGFR3(G697C)                  | 72 |
| FLT4                          | 72 |
| NEK9                          | 72 |
| RIOK3                         | 72 |
| RPS6KA4(Kin.Dom.1-N-terminal) | 72 |
| RSK3(Kin.Dom.1-N-terminal)    | 72 |
| S6K1                          | 72 |
| ABL1-phosphorylated           | 73 |
| LCK                           | 73 |
| PDGFRB                        | 73 |
| PIK3C2G                       | 73 |
| RIPK4                         | 73 |
| SLK                           | 73 |
| STK35                         | 73 |
| WNK4                          | 73 |
| BRSK1                         | 74 |
| CDK2                          | 74 |
| EPHA6                         | 74 |
| PKN1                          | 74 |
| RIPK5                         | 74 |
| STK36                         | 74 |
| TRPM6                         | 74 |
| CSNK1D                        | 75 |
| JNK2                          | 75 |
| MYO3A                         | 75 |
| p38-delta                     | 75 |
| RSK1(Kin.Dom.2-C-terminal)    | 75 |
| AMPK-alpha2                   | 76 |
| BMPR1A                        | 76 |
| CDK4                          | 76 |
| EPHB3                         | 76 |
| PIP5K2C                       | 76 |
| RET                           | 76 |
| ROCK1                         | 76 |

|                               |    |
|-------------------------------|----|
| BUB1                          | 77 |
| HPK1                          | 77 |
| MLK3                          | 77 |
| NEK6                          | 77 |
| PDPK1                         | 77 |
| ABL1(T315I)-nonphosphorylated | 78 |
| ACVR1B                        | 78 |
| DYRK2                         | 78 |
| EPHA3                         | 78 |
| PIK3CA(E542K)                 | 78 |
| PRKCH                         | 78 |
| ULK3                          | 78 |
| AURKB                         | 79 |
| DCAMKL3                       | 79 |
| FYN                           | 79 |
| HIPK2                         | 79 |
| IKK-beta                      | 79 |
| IRAK3                         | 79 |
| LZK                           | 79 |
| PFCDPK1(P.falciparum)         | 79 |
| PIK3CA(H1047Y)                | 79 |
| TEC                           | 79 |
| AKT1                          | 80 |
| CDK5                          | 80 |
| FAK                           | 80 |
| MEK3                          | 80 |
| MRCKB                         | 80 |
| PFTAIRE2                      | 80 |
| YSK1                          | 80 |
| ERK8                          | 81 |
| GRK4                          | 81 |
| HIPK1                         | 81 |
| INSR                          | 81 |
| IRAK4                         | 81 |
| MEK2                          | 81 |
| BMX                           | 82 |
| CAMK2B                        | 82 |
| DAPK1                         | 82 |
| DDR1                          | 82 |
| DRAK1                         | 82 |
| EPHA1                         | 82 |
| EPHA5                         | 82 |
| NDR1                          | 82 |

|                               |    |
|-------------------------------|----|
| PCK2                          | 82 |
| PRKG2                         | 82 |
| PRKX                          | 82 |
| ABL1(F317L)-nonphosphorylated | 83 |
| ADCK3                         | 83 |
| CSNK2A2                       | 83 |
| PFTK1                         | 83 |
| TSSK1B                        | 83 |
| AURKC                         | 84 |
| BRK                           | 84 |
| EPHA8                         | 84 |
| ERBB2                         | 84 |
| FLT3(ITD)                     | 84 |
| GCN2(Kin.Dom.2,S808G)         | 84 |
| JNK3                          | 84 |
| MYO3B                         | 84 |
| PAK1                          | 84 |
| PIM1                          | 84 |
| PYK2                          | 84 |
| SRC                           | 84 |
| ABL1(F317I)-nonphosphorylated | 85 |
| BIKE                          | 85 |
| BRSK2                         | 85 |
| CASK                          | 85 |
| ERK2                          | 85 |
| FGFR4                         | 85 |
| HIPK3                         | 85 |
| KIT(V559D,T670I)              | 85 |
| LYN                           | 85 |
| MST1                          | 85 |
| PIK4CB                        | 85 |
| RAF1                          | 85 |
| TGFBR1                        | 85 |
| ABL1(F317I)-phosphorylated    | 86 |
| ABL2                          | 86 |
| CDK4-cyclinD1                 | 86 |
| EPHB2                         | 86 |
| JAK1(JH1domain-catalytic)     | 86 |
| MAP4K4                        | 86 |
| MEK4                          | 86 |
| MLCK                          | 86 |
| PCK3                          | 86 |



|                               |    |
|-------------------------------|----|
| PHKG1                         | 86 |
| PRKCD                         | 86 |
| SBK1                          | 86 |
| TIE2                          | 86 |
| ACVR1                         | 87 |
| JAK3(JH1domain-catalytic)     | 87 |
| KIT(V559D)                    | 87 |
| LOK                           | 87 |
| PAK7                          | 87 |
| SgK110                        | 87 |
| AMPK-alpha1                   | 88 |
| CSF1R                         | 88 |
| CSNK1A1L                      | 88 |
| EGFR(L861Q)                   | 88 |
| EPHB6                         | 88 |
| FGFR3                         | 88 |
| FLT3(ITD,D835V)               | 88 |
| MET                           | 88 |
| MST3                          | 88 |
| MYLK4                         | 88 |
| p38-beta                      | 88 |
| PIK3CA(E545A)                 | 88 |
| PRKD2                         | 88 |
| RET(V804L)                    | 88 |
| RIPK2                         | 88 |
| ROCK2                         | 88 |
| SYK                           | 88 |
| TNNI3K                        | 88 |
| WEE2                          | 88 |
| ALK(L1196M)                   | 89 |
| CTK                           | 89 |
| DLK                           | 89 |
| EGFR(G719S)                   | 89 |
| EGFR(S752-I759del)            | 89 |
| EPHA4                         | 89 |
| FRK                           | 89 |
| PIK3CD                        | 89 |
| RET(M918T)                    | 89 |
| RPS6KA5(Kin.Dom.1-N-terminal) | 89 |
| STK16                         | 89 |
| ABL1(E255K)-phosphorylated    | 90 |
| ABL1(T315I)-phosphorylated    | 90 |
| ERBB4                         | 90 |

|                               |    |
|-------------------------------|----|
| IKK-epsilon                   | 90 |
| LRRK2(G2019S)                 | 90 |
| MAP4K5                        | 90 |
| MYLK2                         | 90 |
| OSR1                          | 90 |
| PIK3CG                        | 90 |
| RSK1(Kin.Dom.1-N-terminal)    | 90 |
| RSK4(Kin.Dom.2-C-terminal)    | 90 |
| AKT2                          | 91 |
| CAMK1                         | 91 |
| CDK7                          | 91 |
| CDK9                          | 91 |
| CSNK1A1                       | 91 |
| KIT(D816V)                    | 91 |
| MINK                          | 91 |
| PFPK5(P.falciparum)           | 91 |
| VRK2                          | 91 |
| CAMK1G                        | 92 |
| EGFR(L747-T751del,Sins)       | 92 |
| ERK4                          | 92 |
| FGFR2                         | 92 |
| MAP3K3                        | 92 |
| MLK2                          | 92 |
| PLK1                          | 92 |
| RSK2(Kin.Dom.2-C-terminal)    | 92 |
| TAK1                          | 92 |
| ZAP70                         | 92 |
| ABL1(Q252H)-nonphosphorylated | 93 |
| ITK                           | 93 |
| PIK3CA(E545K)                 | 93 |
| PIK3CA(Q546K)                 | 93 |
| PRKCI                         | 93 |
| RET(V804M)                    | 93 |
| RSK3(Kin.Dom.2-C-terminal)    | 93 |
| TAOK1                         | 93 |
| WNK1                          | 93 |
| WNK3                          | 93 |
| CDKL5                         | 94 |
| DYRK1A                        | 94 |
| FLT1                          | 94 |
| GAK                           | 94 |
| LIMK1                         | 94 |
| MKK7                          | 94 |

|                              |    |
|------------------------------|----|
| PRKD3                        | 94 |
| YSK4                         | 94 |
| AURKA                        | 95 |
| CDC2L1                       | 95 |
| CDC2L2                       | 95 |
| CSNK2A1                      | 95 |
| HCK                          | 95 |
| IRAK1                        | 95 |
| LATS1                        | 95 |
| MARK4                        | 95 |
| PAK4                         | 95 |
| PIK3CA(M1043I)               | 95 |
| TLK2                         | 95 |
| AAK1                         | 96 |
| ABL1(Q252H)-phosphorylated   | 96 |
| BRAF                         | 96 |
| CAMK1D                       | 96 |
| CAMK2A                       | 96 |
| ERBB3                        | 96 |
| ERK1                         | 96 |
| ERK5                         | 96 |
| FLT3(K663Q)                  | 96 |
| JAK1(JH2domain-pseudokinase) | 96 |
| MARK1                        | 96 |
| MARK2                        | 96 |
| PAK6                         | 96 |
| PIK3CA(C420R)                | 96 |
| TLK1                         | 96 |
| TYK2(JH2domain-pseudokinase) | 96 |
| CDKL3                        | 97 |
| EGFR(G719C)                  | 97 |
| GRK1                         | 97 |
| IGF1R                        | 97 |
| MAP3K15                      | 97 |
| MAST1                        | 97 |
| MEK1                         | 97 |
| NEK11                        | 97 |
| NEK4                         | 97 |
| p38-gamma                    | 97 |
| PIK3CB                       | 97 |
| PIM3                         | 97 |
| PRP4                         | 97 |
| YANK3                        | 97 |

|                            |     |
|----------------------------|-----|
| ACVRL1                     | 98  |
| DCAMKL2                    | 98  |
| FGFR1                      | 98  |
| MKNK2                      | 98  |
| NIM1                       | 98  |
| PIK3CA                     | 98  |
| TAOK2                      | 98  |
| TGFBR2                     | 98  |
| ABL1(H396P)-phosphorylated | 99  |
| CHEK1                      | 99  |
| IKK-alpha                  | 99  |
| MST2                       | 99  |
| PIP5K2B                    | 99  |
| ABL1(F317L)-phosphorylated | 100 |
| ABL1(M351T)-phosphorylated | 100 |
| ABL1(Y253F)-phosphorylated | 100 |
| ACVR2A                     | 100 |
| ANKK1                      | 100 |
| ASK2                       | 100 |
| BMPR1B                     | 100 |
| BMPR2                      | 100 |
| BRAF(V600E)                | 100 |
| BTK                        | 100 |
| CAMK1B                     | 100 |
| CAMK2D                     | 100 |
| CAMK2G                     | 100 |
| CAMK4                      | 100 |
| CAMKK1                     | 100 |
| CAMKK2                     | 100 |
| CDC2L5                     | 100 |
| CDK4-cyclinD3              | 100 |
| CIT                        | 100 |
| CLK2                       | 100 |
| CSF1R-autoinhibited        | 100 |
| CSK                        | 100 |
| CSNK1E                     | 100 |
| CSNK1G1                    | 100 |
| DAPK2                      | 100 |
| DAPK3                      | 100 |
| DDR2                       | 100 |
| EGFR(L858R,T790M)          | 100 |
| EIF2AK1                    | 100 |
| EPHA2                      | 100 |

|                               |     |
|-------------------------------|-----|
| EPHA7                         | 100 |
| EPHB1                         | 100 |
| ERN1                          | 100 |
| FES                           | 100 |
| FGR                           | 100 |
| FLT3(D835Y)                   | 100 |
| FLT3(ITD,F691L)               | 100 |
| FLT3(R834Q)                   | 100 |
| FLT3-autoinhibited            | 100 |
| GRK2                          | 100 |
| GRK3                          | 100 |
| GRK7                          | 100 |
| GSK3B                         | 100 |
| JAK2(JH1domain-catalytic)     | 100 |
| KIT(A829P)                    | 100 |
| KIT(D816H)                    | 100 |
| KIT-autoinhibited             | 100 |
| LATS2                         | 100 |
| MAP3K1                        | 100 |
| MAP4K2                        | 100 |
| MAPKAPK5                      | 100 |
| MKNK1                         | 100 |
| MST1R                         | 100 |
| MST4                          | 100 |
| MTOR                          | 100 |
| NDR2                          | 100 |
| NEK10                         | 100 |
| NIK                           | 100 |
| p38-alpha                     | 100 |
| PCTK1                         | 100 |
| PDGFRA                        | 100 |
| PHKG2                         | 100 |
| PIK3C2B                       | 100 |
| PIK3CA(H1047L)                | 100 |
| PIP5K1C                       | 100 |
| PKMYT1                        | 100 |
| PLK2                          | 100 |
| PRKD1                         | 100 |
| PRKR                          | 100 |
| RPS6KA4(Kin.Dom.2-C-terminal) | 100 |
| RPS6KA5(Kin.Dom.2-C-terminal) | 100 |
| SGK                           | 100 |
| SGK2                          | 100 |

|                           |     |
|---------------------------|-----|
| SGK3                      | 100 |
| SNARK                     | 100 |
| SNRK                      | 100 |
| SRMS                      | 100 |
| STK39                     | 100 |
| TAOK3                     | 100 |
| TNK2                      | 100 |
| TYK2(JH1domain-catalytic) | 100 |
| TYRO3                     | 100 |
| ULK2                      | 100 |
| VEGFR2                    | 100 |
| VPS34                     | 100 |
| YANK1                     | 100 |
| YES                       | 100 |

1. Czako, B.; Kurti, L.; Mammoto, A.; Ingber, D. E.; Corey, E. J., Discovery of Potent and Practical Antiangiogenic Agents Inspired by Cortistatin A. *Journal of the American Chemical Society* **2009**, *131* (25), 9014-9019.
2. Calogeropoulou, T.; Avlonitis, N.; Minas, V.; Alexi, X.; Pantzou, A.; Charalampopoulos, I.; Zervou, M.; Vergou, V.; Katsanou, E. S.; Lazaridis, I.; Alexis, M. N.; Gravanis, A., Novel Dehydroepiandrosterone Derivatives with Antiapoptotic, Neuroprotective Activity. *Journal of Medicinal Chemistry* **2009**, *52* (21), 6569-6587.
3. Karaman, M. W.; Herrgard, S.; Treiber, D. K.; Gallant, P.; Atteridge, C. E.; Campbell, B. T.; Chan, K. W.; Ciceri, P.; Davis, M. I.; Edeen, P. T.; Faraoni, R.; Floyd, M.; Hunt, J. P.; Lockhart, D. J.; Milanov, Z. V.; Morrison, M. J.; Pallares, G.; Patel, H. K.; Pritchard, S.; Wodicka, L. M.; Zarrinkar, P. P., A quantitative analysis of kinase inhibitor selectivity. *Nat. Biotechnol.* **2008**, *26* (1), 127-132.
